# Supplementary material for: EIF4A3-regulated circ_0087429 can reverse EMT and inhibit the progression of cervical cancer via miR-5003-3p-dependent upregulation of OGN expression
Source: PubMed Central journal article supplement (PMC9069757; doi:10.1186/s13046-022-02368-4), 2022-05-05
Supplement: 13046_2022_2368_MOESM1_ESM.pdf [file 13046_2022_2368_MOESM1_ESM.pdf]

**Table S1** Primer used in this study

| Name           | Primer sequences (5'-3')   |
|----------------|----------------------------|
| circ_0087429   | F: GGTCCAGAGCTGATGCAGAGTG  |
|                | R: GGTTAATCCACCATCCAAGTGTC |
| OGN            | F: TCTACACTTCTCCTGTTACTGCT |
|                | R: GAGGTAATGGTGTTATTGCCTCA |
| SPIN1          | F: TGCTGAACTCGTAAAAGAGACAC |
|                | R: GGTGTCTTTCCGAATGGGGT    |
| EIF4A3         | F: TGGCTCCCACAAGAGAGTTG    |
|                | R: GCACTGGACATTCATGTAGTCA  |
| $\beta$ -actin | F: CCTGTACGCCAACACAGTGC    |
|                | R: AACTCCTGCTTGCTGATCC     |
| GAPDH          | F: CTGACTTCAACAGCGACACC    |
|                | R: TGCTGTAGCCAAATTCGTTGT   |
| U6             | F: CTCGCTTCGGCAGCACA       |
|                | R: AACGCTTCACGAATTTGCGT    |
| miR-5003-3p    | CGCGGCTACTTTTCTAGGTTG      |
| miR-378i       | AGGCGGACTGGACTAGGAGTC      |
| miR-378a-3p    | ACGCACTGGACTTGGAGTCA       |
| miR-452-3p     | CGGGCTCATCTGCAAAGAAG       |
| miR-7846-3p    | ATGCAGCGGAGCCTGGAG         |

**Table S2** Oligonucleotides used in this study

| Definition        | sequences (5'-3')                                                    |
|-------------------|----------------------------------------------------------------------|
| si-circ_0087429-1 | Sense: GAGCUGAUGCAGAGUGCUUGUTT<br>Antisense: ACAAGCACUCUGCAUCAGCUCTT |
| si-circ_0087429-2 | Sense: GAUGCAGAGUGCUUGUGAUUUTT<br>Antisense: AAAUCACAAGCACUCUGCAUCTT |
| si-circ_0087429-3 | Sense: UGCAGAGUGCUUGUGAUUUCATT<br>Antisense: UGAAAUCACAAGCACUCUGCATT |
| si-OGN-1          | Sense: GACUCGAUUUUACAGGAAATT<br>Antisense: UUUCCUGUAAAUCGAGUCTT      |
| si-OGN-2          | Sense: CAUUAUCUAUGAUUAUGGATT<br>Antisense: UCCAUAUAUCAUAGAUAAUGTT    |
| si-OGN-3          | Sense: GGAAUCCGUGCCUCUAAAUUUTT<br>Antisense: AAUUAAAGAGGCACGGAUUCCTT |
| si-EIF4A3-1       | Sense: GAGCAGAUUUACGAUGUAUTT<br>Antisense: AUACAUCGUAAAUCUGCUCTT     |
| si-EIF4A3-2       | Sense: CUCUCGGUGACUACAUGAATT<br>Antisense: UUCAUGUAGUCACCGAGAGTT     |
| si-EIF4A3-3       | Sense: CGAGCAAUCAAGCAGAUCATT<br>Antisense: UGAUCUGCUUGAUUGCUCGTT     |
| si-NC             | Sense: UUCUCCGAACGUGUCACGUTT<br>Antisense: ACGUGACACGUUCGGAGAATT     |

|                          |                                                                        |
|--------------------------|------------------------------------------------------------------------|
| miR-5003-5p mimics       | Sense: UACUUUUCUAGGUUGUUGGGG<br>Antisense: CCCCAACAACCUAGAAAAGUA       |
| miR-5003-5p mimics NC    | Sense: UCACAACCUCCUAGAAAGAGUAGA<br>Antisense: UCUACUCUUUCUAGGAGGUUGUGA |
| miR-5003-5p inhibitor    | CCCCAACAACCUAGAAAAGUA                                                  |
| miR-5003-5p inhibitor NC | UCUACUCUUUCUAGGAGGUUGUGA                                               |
